# Supplementary material
Source: HighWire-hosted journal article supplement (https://ard.bmj.com/content/82/12/1618)
Supplement: inline-supplementary-material-1 [file inline-supplementary-material-1.pdf]

**Supplementary Table 1 Sensitivity analysis excluding unexposed individuals with a colchicine prescription after the index date: incidence rates per 10000 person-years (95% CI) and risk of adverse events with colchicine exposure in CPRD GOLD and Aurum databases separately and combined using 2-stage individual patient data meta-analysis**

| Adverse event                  | Colchicine |              |                                               | No prophylaxis |              |                                               | Hazard ratio (95% CI)     |
|--------------------------------|------------|--------------|-----------------------------------------------|----------------|--------------|-----------------------------------------------|---------------------------|
|                                | Event      | Person-years | Incidence rate per 10000-person years (95%CI) | Event          | Person-years | Incidence rate per 10000 person-years (95%CI) |                           |
| <b>Diarrhoea</b>               |            |              |                                               |                |              |                                               |                           |
| GOLD                           | 65         | 0.0404       | 1608.76 (1261.42, 2084.16)                    | 56             | 0.1020       | 552.12 (425.62, 729.41)                       | 2.34 (1.57, 3.49)         |
| Aurum                          | 161        | 0.2681       | 600.27 (514.76, 704.40)                       | 136            | 0.4688       | 290.13 (245.53, 345.39)                       | 1.90 (1.49, 2.42)         |
| <i>Combined</i>                |            |              | <i>791.61 (693.02, 904.22)</i>                |                |              | <i>348.84 (302.01, 402.92)</i>                | <i>2.01 (1.63, 2.47)</i>  |
| <b>Nausea and vomiting</b>     |            |              |                                               |                |              |                                               |                           |
| GOLD                           | 8          | 0.0398       | 202.48 (103.41, 454.15)                       | 8              | 0.1007       | 79.84 (40.78, 179.05)                         | 2.41 (0.80, 7.23)         |
| Aurum                          | 56         | 0.2674       | 208.47 (161.14, 274.69)                       | 69             | 0.4665       | 147.70 (117.10, 189.07)                       | 1.12 (0.73, 1.72)         |
| <i>Combined</i>                |            |              | <i>207.77 (161.67, 267.02)</i>                |                |              | <i>139.32 (110.93, 174.98)</i>                | <i>1.24 (0.83, 1.85)</i>  |
| <b>Bone marrow suppression</b> |            |              |                                               |                |              |                                               |                           |
| GOLD                           | *          | 0.0399       | 50.20 (10.82, 504.00)                         | *              | 0.1008       | 9.95 (0.25, 55.27)                            | 1.85 (0.17, 20.55)        |
| Aurum                          | 10         | 0.2665       | 37.57 (20.64, 76.15)                          | 7              | 0.4661       | 15.04 (7.32, 36.20)                           | 2.80 (1.00, 7.86)         |
| <i>Combined</i>                |            |              | <i>38.72 (20.87, 71.83)</i>                   |                |              | <i>14.55 (6.76, 31.30)</i>                    | <i>2.63 (1.02, 6.78)</i>  |
| <b>Neuropathy</b>              |            |              |                                               |                |              |                                               |                           |
| GOLD                           | 7          | 0.0398       | 176.54 (85.96, 424.37)                        | *              | 0.1008       | 10.00 (0.25, 55.27)                           | 17.39 (2.04, 147.93)      |
| Aurum                          | *          | 0.2664       | 3.76 (0.10, 20.91)                            | *              | 0.4659       | 4.29 (0.93, 43.14)                            | 0.88 (0.07, 11.55)        |
| <i>Combined</i>                |            |              | <i>128.76 (59.92, 276.69)</i>                 |                |              | <i>5.70 (1.19, 27.22)</i>                     | <i>5.14 (0.99, 26.67)</i> |
| <b>Myalgia</b>                 |            |              |                                               |                |              |                                               |                           |
| GOLD                           | 11         | 0.0400       | 276.63 (156.44, 538.55)                       | 9              | 0.1009       | 89.75 (47.68, 190.37)                         | 4.71 (1.81, 12.26)        |
| Aurum                          | 12         | 0.2666       | 45.07 (26.20, 85.03)                          | 11             | 0.4662       | 23.64 (13.35, 46.10)                          | 1.77 (0.75, 4.16)         |
| <i>Combined</i>                |            |              | <i>107.13 (69.90, 164.20)</i>                 |                |              | <i>42.79 (26.97, 67.90)</i>                   | <i>2.73 (1.44, 5.18)</i>  |
| <b>Myocardial infarction</b>   |            |              |                                               |                |              |                                               |                           |
| GOLD                           | 10         | 0.0398       | 253.14 (138.98, 512.94)                       | 8              | 0.1008       | 79.92 (40.79, 189.38)                         | 2.00 (0.75, 5.35)         |
| Aurum                          | 52         | 0.2666       | 194.77 (149.11, 259.47)                       | 55             | 0.4649       | 117.71 (90.76, 155.53)                        | 1.46 (0.98, 2.18)         |
| <i>Combined</i>                |            |              | <i>202.71 (157.09, 261.59)</i>                |                |              | <i>112.51 (87.35, 144.91)</i>                 | <i>1.53 (1.06, 2.21)</i>  |

**Any adverse event**

|                 |     |        |                            |     |        |                          |                   |
|-----------------|-----|--------|----------------------------|-----|--------|--------------------------|-------------------|
| GOLD            | 109 | 0.0409 | 2664.73 (2201.61, 3255.57) | 90  | 0.1025 | 875.11 (709.51, 1091.88) | 2.56 (1.87, 3.49) |
| Aurum           | 268 | 0.2694 | 993.02 (879.74, 1125.19)   | 259 | 0.4684 | 553.14 (489.05, 628.12)  | 1.59 (1.33, 1.91) |
| <i>Combined</i> |     |        | 1313.73 (1183.8, 1457.93)  |     |        | 620.95 (557.26, 691.92)  | 1.79 (1.53, 2.09) |

CI, confidence interval; CPRD, Clinical Practice Research Datalink

\*N<5

**Supplementary Table 2 Sensitivity analysis modelling colchicine as a time-varying exposure: incidence rates per 10000 person-years (95% CI) and risk of adverse events with colchicine exposure in CPRD GOLD and Aurum databases separately and combined using 2-stage individual patient data meta-analysis**

| Adverse event                  | Colchicine |              |                                               | No prophylaxis |              |                                               | Hazard ratio (95% CI)    |
|--------------------------------|------------|--------------|-----------------------------------------------|----------------|--------------|-----------------------------------------------|--------------------------|
|                                | Event      | Person-years | Incidence rate per 10000-person years (95%CI) | Event          | Person-years | Incidence rate per 10000 person-years (95%CI) |                          |
| <b>Diarrhoea</b>               |            |              |                                               |                |              |                                               |                          |
| GOLD                           | 75         | 0.0470       | 1604.93 (1280.45, 2038.92)                    | 69             | 0.1184       | 581.36 (459.32, 746.86)                       | 2.65 (1.24, 5.69)        |
| Aurum                          | 191        | 0.3197       | 596.13 (517.55, 690.30)                       | 151            | 0.5600       | 270.35 (230.77, 318.86)                       | 2.42 (1.52, 3.86)        |
| <i>Combined</i>                |            |              | 784.38 (693.98, 886.54)                       |                |              | 341.91 (298.85, 391.17)                       | 2.48 (1.67, 3.69)        |
| <b>Nausea and vomiting</b>     |            |              |                                               |                |              |                                               |                          |
| GOLD                           | 9          | 0.0464       | 195.51 (103.87, 414.75)                       | 9              | 0.1169       | 77.33 (41.09, 164.03)                         | 0.25 (0.00, 29.98)       |
| Aurum                          | 67         | 0.3189       | 209.65 (165.66, 269.37)                       | 80             | 0.5572       | 143.72 (115.84, 180.58)                       | 1.29 (0.58, 2.91)        |
| <i>Combined</i>                |            |              | 208.05 (165.41, 261.68)                       |                |              | 135.65 (109.80, 167.58)                       | 1.23 (0.56, 2.74)        |
| <b>Bone marrow suppression</b> |            |              |                                               |                |              |                                               |                          |
| GOLD                           | *          | 0.0463       | 64.89 (20.34, 318.92)                         | *              | 0.1173       | 8.54 (0.22, 47.50)                            | 8132.00 (0.01, 8.08E+09) |
| Aurum                          | 16         | 0.3176       | 50.40 (31.39, 86.35)                          | 8              | 0.5567       | 14.40 (7.35, 32.31)                           | 2.58 (0.33, 20.23)       |
| <i>Combined</i>                |            |              | 51.94 (32.30, 83.50)                          |                |              | 13.88 (6.80, 28.34)                           | 3.07 (0.40, 23.57)       |
| <b>Neuropathy</b>              |            |              |                                               |                |              |                                               |                          |
| GOLD                           | 7          | 0.0464       | 151.44 (73.73, 364.11)                        | *              | 0.1172       | 17.15 (3.70, 172.23)                          | 5.57 (0.07, 414.56)      |
| Aurum                          | *          | 0.3179       | 3.15 (0.08, 17.53)                            | *              | 0.5565       | 3.59 (0.77, 36.12)                            | 5.31 (0.25, 114.65)      |
| <i>Combined</i>                |            |              | 110.83 (51.54, 238.33)                        |                |              | 7.85 (2.02, 30.55)                            | 5.40 (0.44, 65.85)       |
| <b>Myalgia</b>                 |            |              |                                               |                |              |                                               |                          |
| GOLD                           | 13         | 0.0464       | 281.74 (166.80, 515.81)                       | 10             | 0.1175       | 85.66 (47.05, 173.55)                         | 4.49 (0.23, 88.17)       |
| Aurum                          | 13         | 0.3182       | 40.92 (24.21, 75.01)                          | 13             | 0.5568       | 23.39 (13.84, 42.89)                          | 2.18 (0.48, 9.87)        |
| <i>Combined</i>                |            |              | 107.56 (72.14, 160.39)                        |                |              | 40.82 (26.62, 62.59)                          | 2.53 (0.66, 9.72)        |
| <b>Myocardial infarction</b>   |            |              |                                               |                |              |                                               |                          |
| GOLD                           | 12         | 0.0464       | 260.84 (150.96, 492.01)                       | 9              | 0.1171       | 77.44 (41.12, 164.37)                         | 4.99 (0.49, 50.49)       |

|                          |     |        |                                   |     |        |                                |                          |
|--------------------------|-----|--------|-----------------------------------|-----|--------|--------------------------------|--------------------------|
| Aurum                    | 60  | 0.3179 | 189.03 (147.42, 246.57)           | 69  | 0.5554 | 124.14 (98.43, 158.90)         | 3.39 (1.53, 7.45)        |
| <i>Combined</i>          |     |        | <i>198.98 (157.18, 251.90)</i>    |     |        | <i>118.05 (94.14, 148.03)</i>  | <i>3.52 (1.66, 7.44)</i> |
| <b>Any adverse event</b> |     |        |                                   |     |        |                                |                          |
| GOLD                     | 123 | 0.0474 | 2584.22 (2158.70, 3119.36)        | 106 | 0.1189 | 889.00 (732.66, 1089.27)       | 3.38 (1.76, 6.48)        |
| Aurum                    | 320 | 0.3209 | 997.62 (892.92, 1118.16)          | 302 | 0.5594 | 540.37 (482.10, 607.75)        | 2.21 (1.54, 3.16)        |
| <i>Combined</i>          |     |        | <i>1292.25 (1174.00, 1422.42)</i> |     |        | <i>613.31 (554.95, 677.81)</i> | <i>2.44 (1.78, 3.34)</i> |

CI, confidence interval; CPRD, Clinical Practice Research Datalink

\*N<5

**Supplementary Table 3 Sensitivity analysis excluding individuals who had had a myocardial infarction ever: incidence rates per 10000 person-years (95% CI) and risk of myocardial infarction with colchicine exposure in CPRD GOLD and Aurum databases separately and combined using 2-stage individual patient data meta-analysis**

| Adverse event                | Colchicine |                  |                                                   | No prophylaxis |                  |                                                  | Hazard ratio<br>(95% CI) |
|------------------------------|------------|------------------|---------------------------------------------------|----------------|------------------|--------------------------------------------------|--------------------------|
|                              | Event      | Person-<br>years | Incidence rate per 10000-<br>person years (95%CI) | Event          | Person-<br>years | Incidence rate per 10000<br>person-years (95%CI) |                          |
| <b>Myocardial infarction</b> |            |                  |                                                   |                |                  |                                                  |                          |
| GOLD                         | 7          | 0.0462           | 152.38 (74.13, 366.68)                            | 5              | 0.1168           | 43.02 (18.16, 128.40)                            | 2.69 (0.79, 9.17)        |
| Aurum                        | 32         | 0.3164           | 99.92 (71.03, 145.26)                             | 33             | 0.5532           | 60.41 (43.38, 86.75)                             | 1.59 (0.95, 2.66)        |
| <i>Combined</i>              |            |                  | <i>107.21 (77.35, 148.61)</i>                     |                |                  | <i>58.17 (41.96, 80.63)</i>                      | <i>1.72 (1.07, 2.77)</i> |

CI, confidence interval; CPRD, Clinical Practice Research Datalink

**Supplementary Table 4 Sensitivity analysis excluding unexposed individuals with a NSAID prescription after the index date: incidence rates per 10000 person-years (95% CI) and risk of adverse events with NSAID exposure in CPRD GOLD and Aurum databases separately and combined using 2-stage individual patient data meta-analysis**

| Adverse event                | NSAID |              |                                               | No prophylaxis |              |                                               | Hazard ratio<br>(95% CI) |
|------------------------------|-------|--------------|-----------------------------------------------|----------------|--------------|-----------------------------------------------|--------------------------|
|                              | Event | Person-years | Incidence rate per 10000-person years (95%CI) | Event          | Person-years | Incidence rate per 10000 person-years (95%CI) |                          |
| <b>AKI</b>                   |       |              |                                               |                |              |                                               |                          |
| GOLD                         | 15    | 0.0683       | 224.3 (137.5, 392.1)                          | 21             | 0.1659       | 123.8 (81.0, 199.1)                           | 2.22 (1.06, 4.63)        |
| Aurum                        | 58    | 0.4126       | 140.7 (109.0, 185.0)                          | 99             | 0.6915       | 143.1 (117.5, 176.1)                          | 1.24 (0.88, 1.74)        |
| <i>Combined</i>              |       |              | <i>154.7 (122.2, 195.9)</i>                   |                |              | <i>139.6 (116.1, 167.9)</i>                   | <i>1.37 (1.01, 1.87)</i> |
| <b>Angina</b>                |       |              |                                               |                |              |                                               |                          |
| GOLD                         | 39    | 0.0680       | 574.0 (419.7, 806.6)                          | 66             | 0.1644       | 404.1 (317.5, 522.6)                          | 1.52 (0.99, 2.33)        |
| Aurum                        | 190   | 0.4088       | 464.3 (402.4, 538.8)                          | 279            | 0.6832       | 408.0 (362.2, 461.4)                          | 1.30 (1.07, 1.58)        |
| <i>Combined</i>              |       |              | <i>481.0 (421.0, 549.6)</i>                   |                |              | <i>407.3 (365.3, 454.1)</i>                   | <i>1.34 (1.12, 1.59)</i> |
| <b>Myocardial infarction</b> |       |              |                                               |                |              |                                               |                          |
| GOLD                         | 12    | 0.0688       | 175.6 (101.6, 331.1)                          | 26             | 0.1666       | 158.1 (108.9, 238.6)                          | 1.01 (0.49, 2.12)        |
| Aurum                        | 69    | 0.4127       | 167.3 (132.7, 214.1)                          | 79             | 0.6918       | 114.6 (92.2, 144.2)                           | 1.76 (1.26, 2.46)        |
| <i>Combined</i>              |       |              | <i>168.5 (135.0, 210.3)</i>                   |                |              | <i>124.0 (102.1, 150.5)</i>                   | <i>1.60 (1.18, 2.17)</i> |
| <b>Peptic ulcer disease</b>  |       |              |                                               |                |              |                                               |                          |
| GOLD                         | 11    | 0.0685       | 161.4 (91.2, 314.5)                           | 6              | 0.1664       | 36.3 (16.6, 95.7)                             | 7.39 (2.55, 21.39)       |
| Aurum                        | 24    | 0.4127       | 58.5 (39.7, 89.9)                             | 43             | 0.6914       | 62.6 (46.8, 85.7)                             | 0.98 (0.59, 1.64)        |
| <i>Combined</i>              |       |              | <i>79.6 (56.6, 112.0)</i>                     |                |              | <i>59.1 (44.4, 78.6)</i>                      | <i>1.43 (0.90, 2.28)</i> |
| <b>Any adverse event</b>     |       |              |                                               |                |              |                                               |                          |
| GOLD                         | 65    | 0.0679       | 962.8 (753.6, 1250.2)                         | 99             | 0.1639       | 605.8 (495.8, 748.2)                          | 1.84 (1.30, 2.59)        |
| Aurum                        | 294   | 0.4065       | 722.8 (642.7, 815.8)                          | 424            | 0.6786       | 624.4 (565.7, 691.0)                          | 1.32 (1.13, 1.54)        |
| <i>Combined</i>              |       |              | <i>761.4 (683.6, 848.1)</i>                   |                |              | <i>620.8 (567.4, 679.3)</i>                   | <i>1.39 (1.21, 1.61)</i> |

AKI, acute kidney injury; CI, confidence interval; CPRD, Clinical Practice Research Datalink; NSAID, non-steroidal anti-inflammatory drug

**Supplementary Table 5 Sensitivity analysis modelling NSAID as a time-varying exposure: incidence rates per 10000 person-years (95% CI) and risk of adverse events with NSAID exposure in CPRD GOLD and Aurum databases separately and combined using 2-stage individual patient data meta-analysis**

| Adverse event                | NSAID |              |                                               | No prophylaxis |              |                                               | Hazard ratio (95% CI)    |
|------------------------------|-------|--------------|-----------------------------------------------|----------------|--------------|-----------------------------------------------|--------------------------|
|                              | Event | Person-years | Incidence rate per 10000-person years (95%CI) | Event          | Person-years | Incidence rate per 10000 person-years (95%CI) |                          |
| <b>AKI</b>                   |       |              |                                               |                |              |                                               |                          |
| GOLD                         | 26    | 0.1053       | 242.9 (166.1, 370.0)                          | 29             | 0.2576       | 110.9 (77.5, 164.4)                           | 1.12 (0.26, 5.34)        |
| Aurum                        | 86    | 0.6021       | 142.5 (115.4, 178.0)                          | 122            | 1.0130       | 120.1 (100.5, 144.7)                          | 1.78 (0.96, 3.30)        |
| <i>Combined</i>              |       |              | <i>160.7 (132.9, 194.5)</i>                   |                |              | <i>118.3 (100.4, 139.4)</i>                   | <i>1.68 (0.95, 2.97)</i> |
| <b>Angina</b>                |       |              |                                               |                |              |                                               |                          |
| GOLD                         | 63    | 0.1046       | 604.4 (472.3, 786.7)                          | 93             | 0.2553       | 362.7 (295.6, 450.1)                          | 4.42 (2.13, 9.18)        |
| Aurum                        | 261   | 0.5959       | 438.7 (388.2, 497.8)                          | 343            | 1.0008       | 342.3 (307.4, 382.3)                          | 3.42 (2.36, 4.97)        |
| <i>Combined</i>              |       |              | <i>466.6 (417.2, 521.8)</i>                   |                |              | <i>346.5 (314.6, 381.7)</i>                   | <i>3.61 (2.59, 5.03)</i> |
| <b>Myocardial infarction</b> |       |              |                                               |                |              |                                               |                          |
| GOLD                         | 20    | 0.1056       | 190.7 (124.8, 306.5)                          | 31             | 0.2581       | 121.7 (86.5, 177.0)                           | 3.30 (0.94, 11.59)       |
| Aurum                        | 90    | 0.6021       | 150.3 (122.6, 186.2)                          | 94             | 1.0130       | 92.3 (75.6, 114.0)                            | 5.17 (2.43, 11.02)       |
| <i>Combined</i>              |       |              | <i>156.7 (129.7, 189.4)</i>                   |                |              | <i>98.9 (82.7, 118.2)</i>                     | <i>4.59 (2.40, 8.77)</i> |
| <b>Peptic ulcer disease</b>  |       |              |                                               |                |              |                                               |                          |
| GOLD                         | 15    | 0.1054       | 143.1 (87.8, 249.9)                           | 8              | 0.2580       | 31.2 (15.9, 70.0)                             | 10.84 (0.71, 165.36)     |
| Aurum                        | 40    | 0.6024       | 66.7 (49.4, 92.5)                             | 61             | 1.0130       | 60.6 (47.4, 78.6)                             | 1.26 (0.51, 3.15)        |
| <i>Combined</i>              |       |              | <i>81.7 (62.4, 106.9)</i>                     |                |              | <i>56.5 (44.5, 71.8)</i>                      | <i>1.57 (0.66, 3.74)</i> |
| <b>Any adverse event</b>     |       |              |                                               |                |              |                                               |                          |
| GOLD                         | 103   | 0.1043       | 984.3 (809.3, 1209.6)                         | 137            | 0.2546       | 536.6 (452.3, 641.6)                          | 3.98 (2.20, 7.20)        |
| Aurum                        | 408   | 0.5930       | 688.7 (623.4, 763.0)                          | 529            | 0.9953       | 531.7 (486.7, 581.9)                          | 2.91 (2.13, 3.97)        |
| <i>Combined</i>              |       |              | <i>740.2 (676.3, 810.2)</i>                   |                |              | <i>532.7 (492.0, 576.8)</i>                   | <i>3.11 (2.36, 4.09)</i> |

AKI, acute kidney injury; CI, confidence interval; CPRD, Clinical Practice Research Datalink; NSAID, non-steroidal anti-inflammatory drug
